# Supplementary material for: D-Dimer Level and Neutrophils Count as Predictive and Prognostic Factors of Pulmonary Embolism in Severe Non-ICU COVID-19 Patients
Source: MDPI journal article supplement (doi:10.3390/v13050758), 2021-04-26
Supplement: s1 [file s1]

**Table S1.** Laboratory data upon admission and difference of paired biomarker data between the value at PE suspicion and the admission.

|                                                      | All<br>N=86      | PE<br>N=30        | NON-PE<br>N=56  | P-value       |
|------------------------------------------------------|------------------|-------------------|-----------------|---------------|
| <b>Laboratory Parameters Upon Admission</b>          |                  |                   |                 |               |
| Platelets [G/L]                                      | 222 [176-279]    | 222 [167-279]     | 223 [177-279]   | 0.8820        |
| WBC [G/L]                                            | 7.5 [5.8-9.6]    | 9.4 [6.9-10.5]    | 6.8 [5.2-8.7]   | <b>0.0088</b> |
| Lymphocytes [G/L]                                    | 0.9 [0.7-1.2]    | 0.9 [0.7-1.2]     | 0.9 [0.8-1.3]   | 0.2688        |
| Neutrophils [G/L]                                    | 5.4 [4.0-8.4]    | 7.0 [4.7-8.9]     | 5.2 [3.9-6.7]   | 0.0706        |
| C Reactive Protein, [mg/L]                           | 108 [65-167]     | 112 [73-166]      | 108 [65-161]    | 0.7692        |
| Ferritin [μg/L]                                      | 975 [479-1666]   | 1139 [626-2152]   | 968 [441-1356]  | 0.2212        |
| BNP [pg/mL]                                          | 56 [11-198]      | 65 [30-407]       | 47 [10-195]     | 0.2873        |
| Troponin [ng/L]                                      | 12 [4-22]        | 12 [5-19]         | 12 [4-27]       | 0.8817        |
| Serum creatinine [μmol/L]                            | 80 [61-116]      | 80 [60-120]       | 83 [63-112]     | 0.9003        |
| Prothrombin time ratio [%]                           | 88 [78-96]       | 83 [75-89]        | 90 [80-98]      | <b>0.0446</b> |
| Fibrinogen [g/L]                                     | 6.4 [5.0-7.4]    | 6.0 [4.4-7.3]     | 6.4 [5.1-7.4]   | 0.4976        |
| D-dimer [ng/mL]                                      | 2250 [1065-5025] | 4335 [2432-17315] | 1343 [763-2736] | <b>0.0008</b> |
| <b>Difference Of Paired Biomarker Data</b>           |                  |                   |                 |               |
| Paired D-dimer difference (ng/mL),<br>mean±SD        | 1988 ± 5381      | 3669 ± 7894       | 892 ± 2422      | 0.0584        |
| Paired WBC difference (G/L), mean±SD                 | -0.2 ± 4.0       | 0.4 ± 5.2         | -0.5 ± 3.1      | 0.4494        |
| Paired Neutrophil count difference (G/L),<br>mean±SD | -0.2 ± 4.0       | 0.2 ± 5.1         | -0.4 ± 3.4      | 0.6452        |

Data were represented by median with IQR, and compared by Mann-Whitney U-test. For each paired variable, the value represents the mean ± SD difference calculated between the value at PE suspicion during hospitalization and upon admission. Values were compared in overall population with a paired Mann-Whitney U-test.

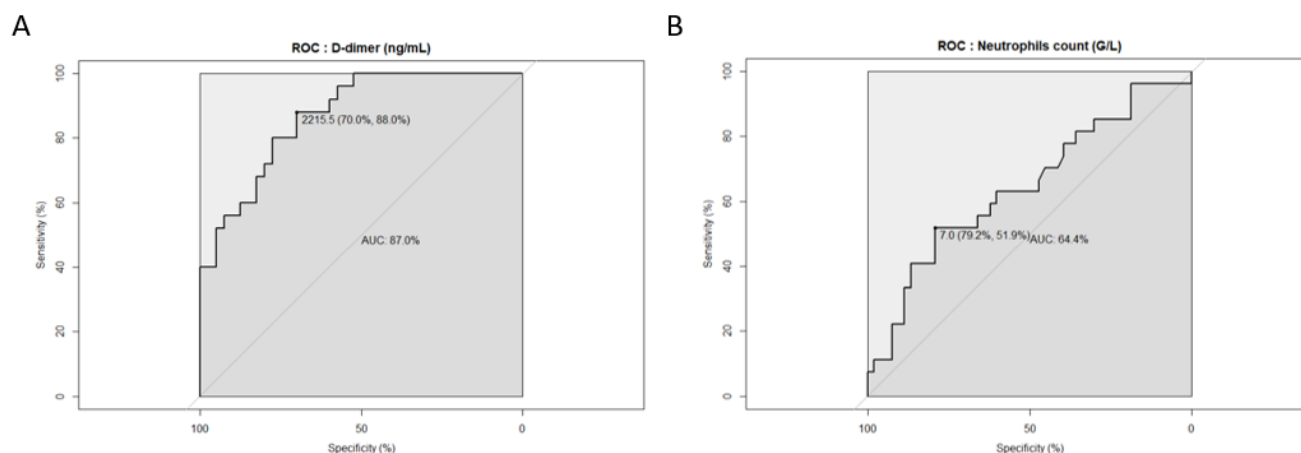

**Figure S1.** Receiver-operating characteristics (ROC) curve of biomarkers identified as predictive factors of pulmonary embolism during medicine ward hospitalization for non-ICU COVID-19. ROC curve and area under curve (AUC) of D-dimer is in the panel A, and of neutrophils count in the panel B. The threshold corresponded to the best sensitivity-specificity ratio, with in brackets the specificity displayed, followed by the sensitivity.

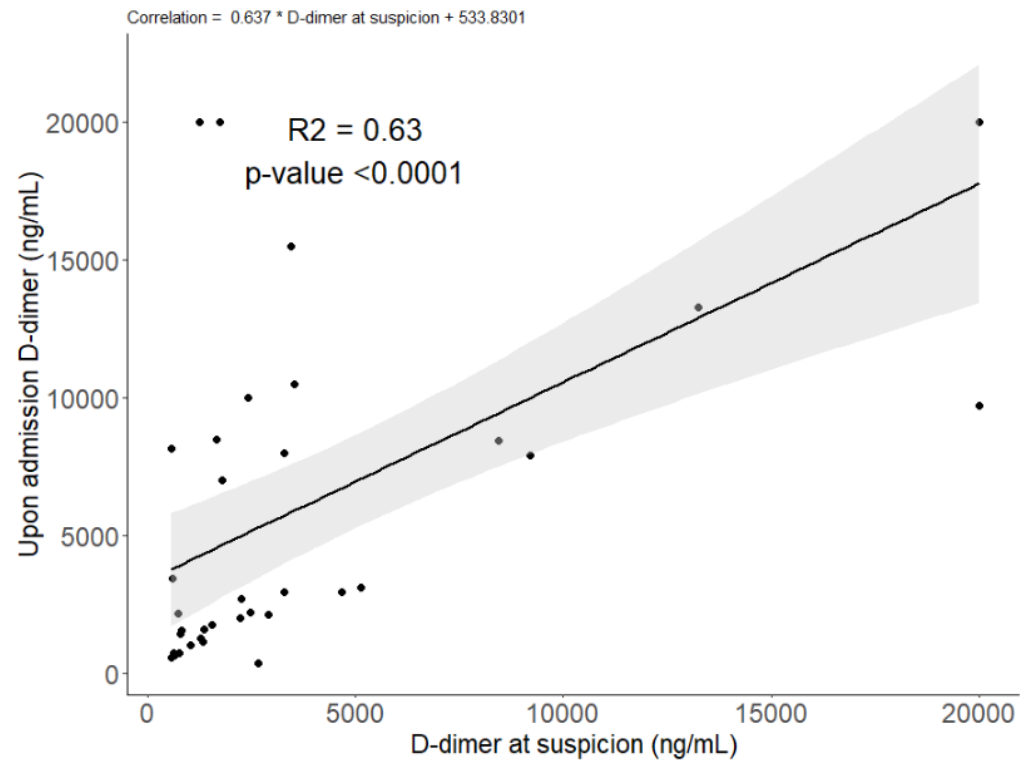

**Figure S2.** Correlation between D-dimer level upon admission and level at the suspicion time of PE evaluated by Pearson coefficient with a linear regression model.

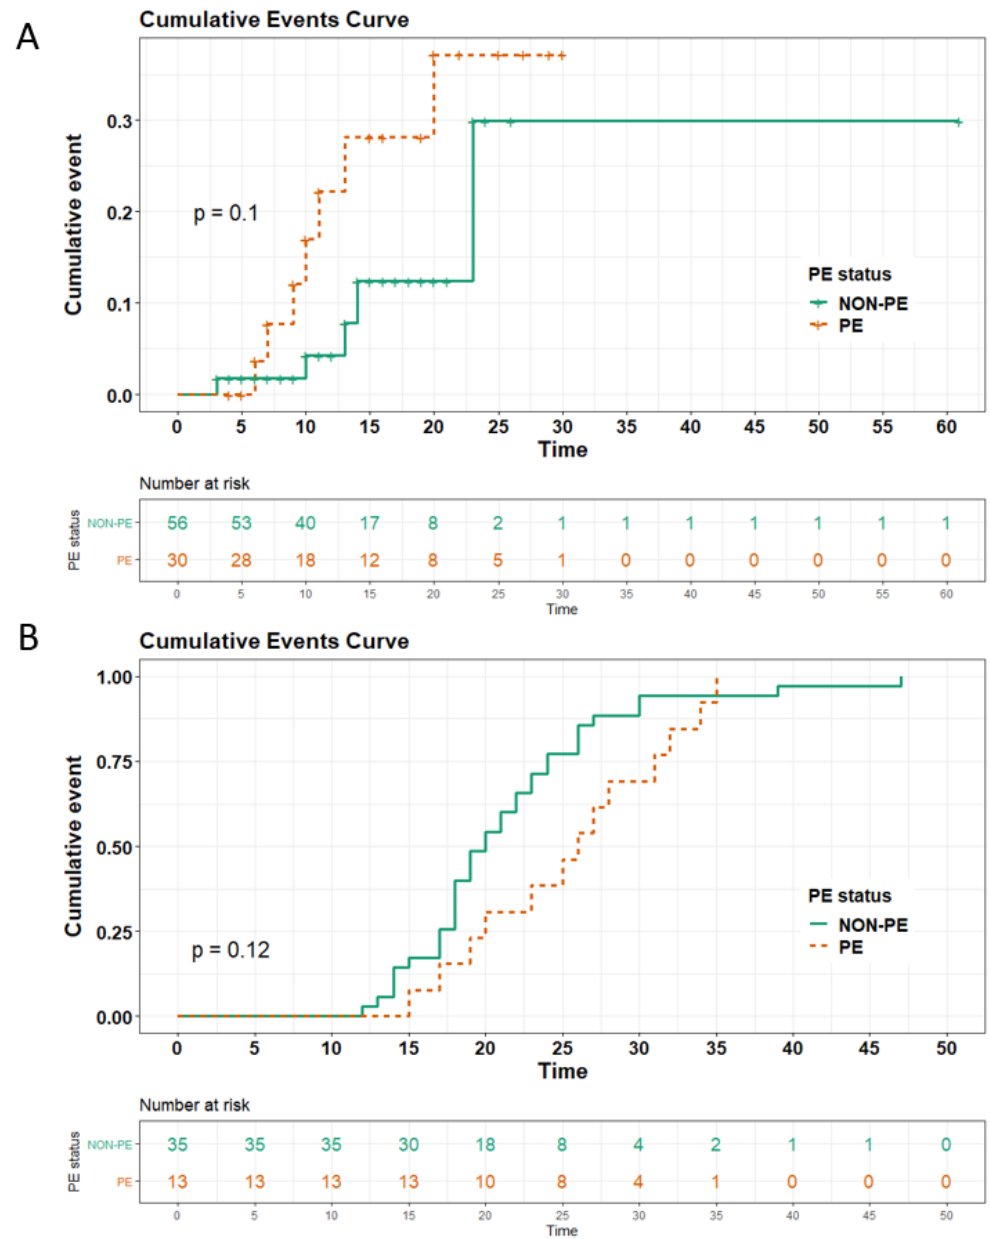

**Figure S3.** Cumulative events curve of ICU transfer or death in panel **A** and time to hospitalization discharge in panel **B** depending to the pulmonary embolism (PE) status. The “ $p$ ” represents the global  $p$ -value of Logrank test in the Cox model. The risk table represents the patients still at risk of the event.
